# Supplementary material for: Enantiomorphic kagome bands in a two-dimensional covalent organic framework with non-trivial magnetic and topological properties
Source: Royal Society of Chemistry journal article supplement (doi:10.1039/d3cp04688e), 2023-11-21
Supplement: d3cp04688e1.pdf [file d3cp04688e1.pdf]

## Electronic Supplementary Information for Enantiomorphous Kagome Bands in a Two-dimensional Covalent Organic Framework with Non-trivial Magnetic and Topological Properties

Quan Gao,<sup>a</sup> Xuelian Sun,<sup>a</sup> Xuhui Xu,<sup>a</sup> Xinxin Jiang,<sup>a</sup> Zhikuan Wang,  
<sup>a</sup> Lei Yang,<sup>a</sup> Dongmei Li,<sup>a</sup> Bin Cui,<sup>\*a</sup> and Desheng Liu<sup>†ab</sup>

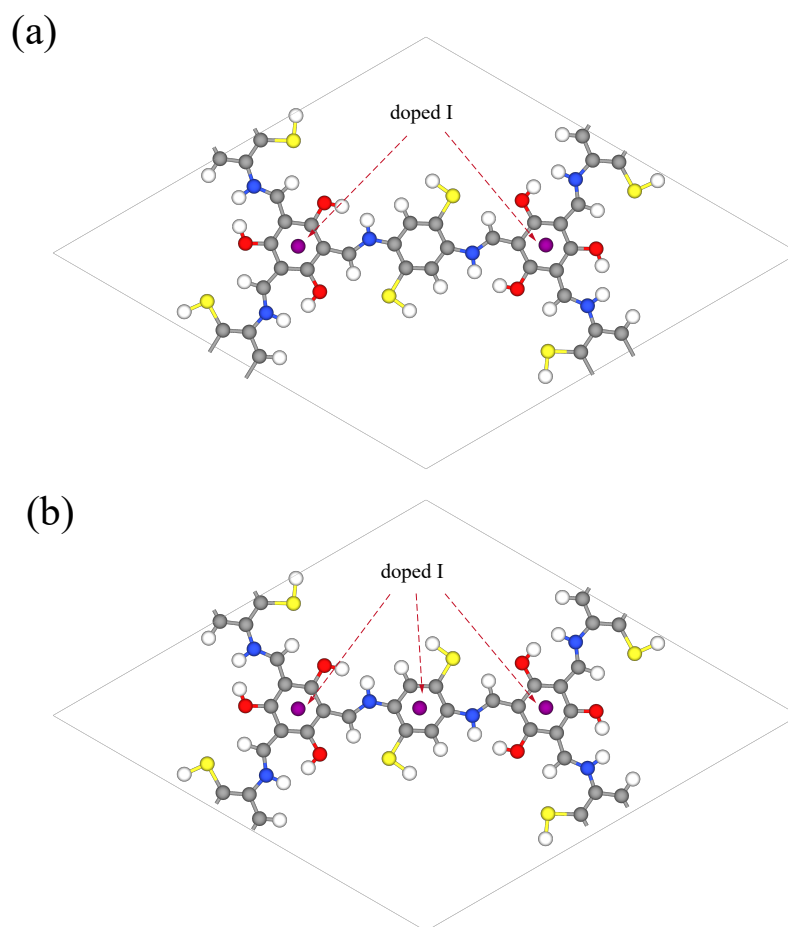

**Fig. S1.** The lattice configuration of COF-SH which is doped with (a) 2 iodine atoms and (b) 3 iodine atoms per unit cell. The doping position hollowing(H) over the benzene group that is the same as the 1 iodine atom doped case.

<sup>a</sup> School of Physics, National Demonstration Center for Experimental Physics Education, Shandong University, Jinan 250100, China.

<sup>b</sup> Department of Physics, Jining University, Qufu 273155, China.

\* Email: cui bin@sdu.edu.cn

† Email: liuds@sdu.edu.cn

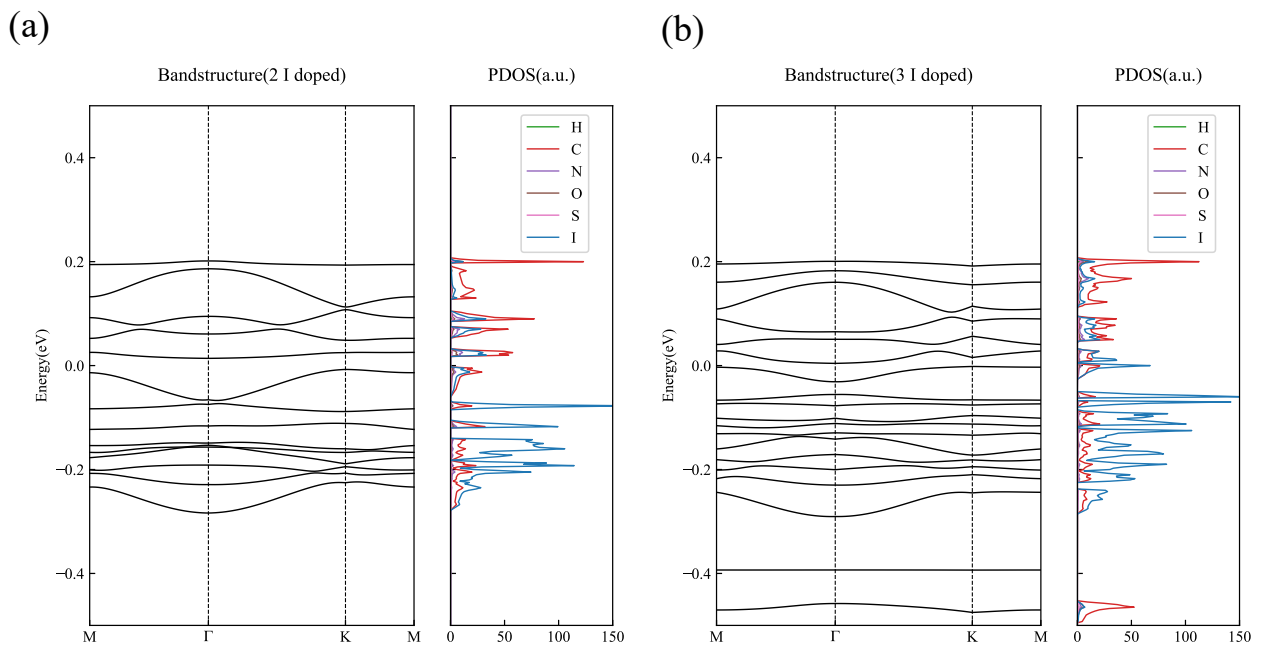

**Fig. S2.** (a) Band structure and PDOS of two iodine atoms doped. (b) Band structure and PDOS of three iodine atoms doped. All the figures are calculated with SOC, and the other DFT parameters are the same as the 1 iodine atom doped case. The doping position is shown in Fig.S1.
